## *Ahr* and *Cyp1a2* genotypes both affect susceptibility to motor deficits following gestational and lactational exposure to polychlorinated biphenyls

Breann T. Colter<sup>1\*</sup>, Helen Frances Garber<sup>1,2\*</sup>, Sheila M. Fleming<sup>3,4</sup>, Jocelyn Phillips Fowler<sup>1</sup>, Gregory D. Harding<sup>1</sup>, Molly Kromme Hooven<sup>1</sup>, Amy Ashworth Howes<sup>1</sup>, Smitha Krishnan Infante<sup>1</sup>, Anna L. Lang<sup>1,5</sup>, Melinda Curran MacDougall<sup>6</sup>, Melinda Stegman<sup>1</sup>, Kelsey Taylor<sup>1</sup> and Christine Perdan Curran<sup>1</sup>

\* These two authors contributed equally to this work.

<sup>1</sup> Department of Biological Sciences, Northern Kentucky University, Highland Heights, KY, USA 41076

<sup>2</sup> The Royal (Dick) School of Veterinary Studies. The University of Edinburgh. Edinburgh, UK EH25 9RG (present address)

<sup>3</sup> Department of Psychology and Neurology, University of Cincinnati, Cincinnati, OH 45267, USA.

<sup>4</sup> Department of Pharmaceutical Sciences, Northeast Ohio Medical University, Rootstown, OH, USA (present address).

<sup>5</sup> Department of Pharmacology and Toxicology, University of Louisville, Louisville KY 40202 (present address)

<sup>6</sup> University of Michigan School of Public Health Center for Statistical Genetics. Ann Arbor, MI, USA

Address correspondence to:

Christine Perdan Curran, PhD  
SC204D Nunn Drive  
Department of Biological Sciences  
Northern Kentucky University  
Highland Heights, KY 41076  
Phone: 859-572-6914  
Email: [CurranC1@nku.edu](mailto:CurranC1@nku.edu)

1 **Abstract**

2 Polychlorinated biphenyls (PCBs) are persistent organic pollutants known to cause adverse health effects  
3 and linked to neurological deficits in both human and animal studies. Children born to exposed mothers  
4 are at highest risk of learning and memory and motor deficits. We developed a mouse model that mimics  
5 human variation in the aryl hydrocarbon receptor and cytochrome P450 1A2 (CYP1A2) to determine if  
6 genetic variation increases susceptibility to developmental PCB exposure. In our previous studies, we  
7 found that high-affinity *Ahr<sup>b</sup>Cyp1a2(-/-)* and poor-affinity *Ahr<sup>d</sup>Cyp1a2(-/-)* knockout mice were most  
8 susceptible to learning and memory deficits following developmental PCB exposure compared with  
9 *Ahr<sup>b</sup>Cyp1a2(+/+)* wild type mice (C57BL/6J strain). Our follow-up studies focused on motor deficits,  
10 because human studies have identified PCBs as a potential risk factor for Parkinson's disease. Dams were  
11 treated with an environmentally relevant PCB mixture at gestational day 10 and postnatal day 5. We used  
12 a motor battery that included tests of nigrostriatal function as well as cerebellar function, because PCBs  
13 deplete thyroid hormone, which is essential to normal cerebellar development. There was a significant  
14 effect of PCB treatment in the rotarod test with impaired performance in all three genotypes, but  
15 decreased motor learning as well in the two *Cyp1a2(-/-)* knockout lines. Interestingly, we found a main  
16 effect of genotype with corn oil-treated control *Cyp1a2(-/-)* mice performing significantly worse than  
17 *Cyp1a2(+/+)* wild type mice. In contrast, we found that PCB-treated high-affinity *Ahr<sup>b</sup>* mice were most  
18 susceptible to disruption of nigrostriatal function with the greatest deficits in *Ahr<sup>b</sup>Cyp1a2(-/-)* mice. We  
19 conclude that differences in both genes affect susceptibility to motor deficits following developmental  
20 PCB exposure.

21

22 **Keywords:** Polychlorinated biphenyls, aryl hydrocarbon receptor, CYP1A2, Parkinson's disease, motor  
23 function, cerebellum

## 24 1. Introduction.

25 Polychlorinated biphenyls (PCBs) are widespread persistent organic pollutants linked to numerous human  
26 health problems, with the most serious effects seen in children of exposed mothers (Ross 2004, Schantz et  
27 al. 2003, Jacobson et al. 2003). They are number 5 on the U.S. government's list of priority pollutants  
28 (ATSDR 2015). Worldwide, an estimated 200 billion kg remain in the environment (WHO 2003). The  
29 primary route of exposure is contaminated food, especially fatty fish, meat and dairy products (Malisch and  
30 Kotz 2014, Langer et al. 2007a, Gomara et al. 2005). New sources of PCB exposure have been reported  
31 with the inadvertent production of highly toxic PCB congeners (e.g. PCB 77 and PCB 153) during the  
32 synthesis of paint pigments (Anezaki et al. 2015, Hu and Hornbuckle 2010) and the discovery of airborne  
33 PCBs near rural and urban schools (Marek et al. 2017). PCBs will remain a problem for generations because  
34 highly exposed cohorts are now reaching reproductive age (Bányiová et al. 2017, Quinn *et al.* 2011).

35 Multiple human studies found deficits in motor function in children exposed to high levels of PCBs  
36 (Boucher et al. 2016, Wilhelm et al. 2008, Vreugdenhil et al. 2002, Stewart et al. 2000). The hydroxylated  
37 metabolite 4-OH-CB 107 can also cause motor deficits in highly exposed children (Berghuis et al. 2013).  
38 In adults, an increased risk of Parkinson's disease (PD) was reported in women with high workplace  
39 exposures (Steenland et al. 2006) and in adults who consumed contaminated whale meat and blubber  
40 (Petersen et al. 2008). Rodent studies found adverse PCB effects in both the striatum (Caudle et al. 2006,  
41 Chishti *et al.* 1996) and cerebellum (Nguon et al. 2005). PCB effects on dopamine, the major  
42 neurotransmitter associated with motor function, are well known (Seegal et al. 1986, 1994, 1997, 2005).

43 PCBs occur as mixtures of coplanar congeners which can bind and activate the aryl hydrocarbon receptor  
44 and non-coplanar congeners which do not. Human studies clearly show differential responses to PCBs and  
45 related AHR agonists (Marek et al. 2014, Novotna *et al.* 2007, van Duursen *et al.* 2005, Tsuchiya et al.  
46 2003). The AHR regulates three members of the cytochrome P450 family: CYP1A1, CYP1A2 and  
47 CYP1B1. The level of CYP1A2 found in human livers varies about 60-fold (Nebert et al. 2006), and  
48 maternal CYP1A2 can sequester planar pollutants to prevent transfer to offspring (Curran et al. 2011a,

49 Dragin et al. 2006,). In humans, there is a greater than 12-fold difference in the inducibility of CYP1A1,  
50 although the polymorphism responsible has not been identified (Nebert et al. 2004).

51 We developed a mouse model to mimic human variation in the AHR and CYP1A2 to better understand  
52 genetic susceptibility to PCBs and similar pollutants. We showed that both high-affinity *Ahr<sup>b</sup>Cyp1a2(-/-)*  
53 knockout mice and poor-affinity *Ahr<sup>d</sup>Cyp1a2(-/-)* mice were more susceptible to learning and memory  
54 deficits when exposed to an environmentally relevant mixture of PCBs during gestation and lactation  
55 compared with *Ahr<sup>b</sup>Cyp1a2(+/+)* wild type mice (Curran *et al.* 2011a-b, 2012). The studies described here  
56 extend those findings by testing the hypothesis that there is similar genetic susceptibility to PCB-induced  
57 motor deficits. Our motor battery was also designed to help clarify if PCBs are a significant risk factor for  
58 Parkinson's disease.

## 59 **2. Materials and Methods**

### 60 **2.1 Animals.**

61 Three genotypes of mice were included. High-affinity *Ahr<sup>b</sup>Cyp1a2(+/+)* wild type mice were purchased  
62 from The Jackson Laboratory (Bar Harbor, ME) as C57BL/6J mice, which was the background strain for  
63 the two knockout lines used: *Ahr<sup>b</sup>Cyp1a2(-/-)* and poor-affinity *Ahr<sup>d</sup>Cyp1a2(-/-)*. All animals were housed  
64 in standard shoebox polysulfone cages with corncob bedding and one 5.1 cm<sup>2</sup> nestlet per week as  
65 enrichment. Water and Lab Diet 5015 chow were provided *ad libitum*.

66 Animals were kept on a 12h/12h light-dark cycle with all experiments conducted during the light cycle.  
67 Genotype was confirmed at the end of the behavior experiments. All experiments were approved by the  
68 Northern Kentucky University Institutional Animal Care and Use Committee. All husbandry and handling  
69 was in accordance with the Eighth Guide for the Care and Use of Laboratory Animals and the ARRIVE  
70 guidelines.

### 71 **2.2 Breeding.**

72 Nulliparous females between 2.5 and 4 months of age were mated on a four-day breeding cycle with  
73 males of the same genotype. Females were separated from males the morning when a vaginal plug was  
74 found. Litters were culled or cross-fostered to balance litter size at 6 pups per dam, matching pups with  
75 dams of the same genotype and treatment. Pups were weaned at postnatal day 25, and behavioral testing  
76 began at P60.

### 77 **2.3 Treatments.**

78 We used an environmentally relevant mixture of coplanar (PCB 77, 126, and 169) and noncoplanar (PCB  
79 105, 118, 138, 153, 180) congeners. Dams were randomly assigned to treatment groups and treated by  
80 gavage at gestational day 10 (GD 10) and postnatal day 5 (PND 5). Controls were treated with the corn oil  
81 vehicle. Additional details on dosing were reported in Curran et al. (2011a).

### 82 **2.4 Chemicals.**

83 Polychlorinated biphenyl congeners were ordered from UltraScientific (N. Kingstown, RI). Unless  
84 otherwise noted, all other reagents were purchased from Sigma-Aldrich (St. Louis, MO).

### 85 **2.5 Western blot.**

86 CYP1A1 induction was confirmed in high-affinity *Ahr*<sup>b</sup> mice using livers collected from P30 littermates  
87 of animals used in behavior. The liver was removed, rinsed in ice-cold phosphate buffered saline, blotted  
88 and stored at -80°C until processing. Approximately 500 mg of tissue per animal was homogenized using  
89 a polytron homogenizer and a buffer of 0.25 M sucrose, 10 mM HEPES, 1 mM Na<sub>2</sub>EDTA, and 1 mM  
90 EGTA with 0.1% bovine serum albumin (BSA). The buffer was adjusted to pH 7.2 using KOH.  
91 Microsomes were prepared using multiple centrifugations to remove cellular debris and other organelles  
92 before ultracentrifugation at 40,000 g for 40 min. Microsomes were resuspended in 1 ml of the  
93 homogenization buffer. Protein concentrations were determined by the Bradford assay (Sigma-Aldrich,  
94 St. Louis MO), following the manufacturer's protocol. Microsomal proteins (10 µg/lane) were separated  
95 on 12% mixed alcohol-detergent-polyacrylamide gel electrophoresis (MAD-PAGE) under denaturing

96 conditions (Brown, 1988). Separated proteins were transferred to PVDF membranes. Western blot  
97 analysis was performed using rabbit polyclonal anti-CYP1A1 antibody (Millipore AB1247) and a  
98 horseradish peroxidase-conjugated secondary antibody (Daiichi). The SuperSignal Pico enhanced  
99 chemiluminescence system (Pierce) was to detect primary antibody binding, with exposure times ranging  
100 from 10 to 60 sec. N = 4-6 per group.

## 101 **2.6 EROD assay.**

102 Microsomes from liver, cortex and cerebellum were prepared as described in the previous section to  
103 measure CYP1A1 enzymatic activity in PCB-exposed and control animals using the well-known  
104 ethoxyresorufin-O-deethylase (EROD) assay. Unknowns were quantified using a standard curve, and  
105 purified human CYP1A1 was used as a positive control following the methods of Thompson et al. (2010).  
106 N = 5-9 per group.

## 107 **2.7 Glutathione assay.**

108 Reduced glutathione (GSH) and oxidized GSSG were measured in liver, cortex and cerebellum using a  
109 standard kit (Cayman Chemicals, Ann Arbor MI) and following the manufacturer's protocols N = 3-5 per  
110 group.

## 111 **2.8 Motor function tests.**

112 One male and one female from each litter were randomly assigned to behavioral testing. A comprehensive  
113 battery of tests was used to assess function in both the cerebellum and nigrostriatal pathways. Each  
114 animal went through the same experimental protocol, and each animal was limited to one test per day.

115 Experiments were conducted within a 4 h time block to avoid confounding by circadian rhythms.

116 Experiments are described in the order in which they were performed. Animal handlers and those

117 analyzing the data were naïve to the genotype and treatment. N ≥ 15 litters per group. Video

118 demonstrating the techniques and equipment can be viewed at:

119 <https://www.youtube.com/watch?v=TximAxZcomk>

120 **2.8.1 Rotarod.**

121 Mice were acclimated to the rotarod apparatus for one day at 0 rpm and one day at a constant 2 rpm  
122 speed. Testing was conducted with the rotarod set to accelerate from 1-20 rpm over 180 s, for a maximum  
123 trial of 300 s. Latency to fall was recorded. Mice received 3 trials per day for 5 days with an inter-trial  
124 interval of 5 min. Rotarod is one of the most widely used tests of cerebellar function (Nadler et al. 2006).

125 **2.8.2 Gait analysis.**

126 The hind paws of mice were coated with nontoxic paint, then the mice walked down a 5 cm x 28 cm alley  
127 into a black-lined escape cage. Two days were used for training followed by a test day with three trials  
128 per day. Trials where mice ran or stopped were not included in the analysis. Stride length and stride width  
129 were measured, and the differential between the longest and shortest strides was calculated during  
130 analysis. Deficits in hind limb control result in uneven gait patterns in rodents (Fleming et al. 2004).  
131 Striatal lesions would result in more steps and shorter steps. Cerebellar lesions would result in unequal  
132 stride lengths.

133 **2.8.3 Sticker removal.**

134 The sticker removal test was used to assess sensorimotor function (Schallert, 1988). Mice must detect the  
135 presence of a round 6.35 mm sticker on their snout and use their front paws to remove it. The latency to  
136 remove the sticker was recorded. Each mouse received a single test unless the sticker fell off or was not  
137 correctly placed on the snout. Mice not removing the sticker after 60 s were assigned a time of 60 s.

138 **2.8.4 Pole test.**

139 The pole test measures gross motor coordination and can detect impairments in nigrostriatal pathways  
140 (Sedelis et al. 2001, Fernagut et al., 2003), which can be reversed by treatment with L-DOPA (Ogawa et  
141 al. 1985, 1987; Matsuura et al. 1997). A 50cm vertical pole was placed inside the animal's home cage.  
142 Each mouse was placed at the top of the pole, with its head facing upward. Mice were trained to turn and

143 climb down to the home cage with 5 trials per day for 2 days and tested on the Day 3. The time to turn  
144 and time to descend were recorded.

### 145 **2.8.5 Challenging balance beam.**

146 Mice were trained for two days (5 trials per day) on a smooth beam decreasing in width from 35 to 5cm.  
147 Each beam segment was 25 cm in length for a total length of 1 m. Mice were tested on the third day with  
148 the beam covered by a wire mesh. Latency to cross, steps and slips were recorded, and the slip:step ratio  
149 was calculated during analysis. This protocol has been successfully used to assess nigrostriatal deficits in  
150 alpha-synuclein over-expressing mice and other PD mouse models. (Schultheis 2013, Fleming et al.  
151 2004).

### 152 **2.9 Data analysis.**

153 Data were analyzed using SAS Proc Mixed Models Analysis of Variance with litter as the unit of  
154 analysis. For rotarod, day was included as a repeated measure. When differences were found, we  
155 examined slice effects with a correction for multiple post-hoc analyses. Data are presented as least square  
156 means  $\pm$  the standard error of the mean (SEM).

## 157 **3. Results**

### 158 **3.1 Assessment of AHR activation by CYP1A1 upregulation.**

159 Our Western blot and EROD results confirm that the AHR is only activated in PCB-treated high-affinity  
160 *Ahr<sup>b</sup>* mice and not in poor-affinity *Ahr<sup>d</sup>* mice or the corn oil-treated controls. At P30, levels of CYP1A1  
161 protein were highest in livers of PCB-treated *Ahr<sup>b</sup>Cyp1a2(-/-)* knockout mice, but CYP1A1 protein was  
162 also present in PCB-treated *Ahr<sup>b</sup>Cyp1a2(+/+)* wild type mice (Fig 1). The EROD assays showed  
163 significantly higher CYP1A1 activity in the livers of P30 *Ahr<sup>b</sup>* mice ( $P < 0.001$ ) with nearly undetectable  
164 activity in PCB-treated *Ahr<sup>d</sup>Cyp1a2(-/-)* knockout mice and the corn oil-treated controls (Fig 2A). There



165 was a trend for higher EROD activity in the cerebellum of *Ahr<sup>b</sup>Cyp1a2(-/-)* knockout mice ( $P = 0.08$ )  
166 compared with all other groups (Fig 2B). Similar trends ( $P = 0.06$ ) were seen in cortex (data not shown).

### 167 **3.2 Assessment of oxidative stress.**

168 Glutathione levels were significantly higher ( $F_{2,11} = 8.48$ ;  $P < 0.05$ ) in the liver of PCB-treated  
169 *Ahr<sup>b</sup>Cyp1a2(-/-)* knockout mice as well as levels of oxidized glutathione (GSSG) ( $F_{2,11} = 16.75$ ;  $P < 0.01$ ),  
170 indicating that oxidative stress response had been induced in these animals. There were no differences by  
171 treatment or genotype for GSH levels in the cortex or cerebellum; however PCB-treated *Ahr<sup>b</sup>Cyp1a2(-/-)*  
172 knockout mice had significantly higher levels of GSSG in the cortex ( $F_{2,11} = 9.97$ ;  $P < 0.05$ ).

### 173 **3.3 Motor function test results.**

174 Data from behavior experiments are presented in the order in which they were performed.

#### 175 **3.3.1 Rotarod results.**

176 There was a significant main effect of genotype with both groups of *Cyp1a2(-/-)* mice having shorter  
177 latencies to fall compared with wild type mice ( $F_{2,205} = 14.74$ ;  $P < 0.0001$ ) and a significant main effect of  
178 treatment with PCB-treated mice having shorter latencies to fall ( $F_{2,205} = 16.81$ ;  $P < 0.0001$ ). All groups of  
179 mice did show motor learning over the 5 days of testing with a significant main effect of day ( $F_{4,587} =$   
180  $75.83$ ;  $P < 0.0001$ ); however, both groups of knockouts showed less improvement compared with  
181 *Ahr<sup>b</sup>Cyp1a2(+/+)* wild type mice. Female knockouts also showed the greatest impairments compared  
182 with controls (Figs. 3A-D).

#### 183 **3.3.2 Gait analysis.**

184 We found a significant main effect of genotype with both groups of *Cyp1a2(-/-)* mice having longer  
185 strides compared with wild type mice ( $F_{2,248} = 16.95$ ;  $P < 0.0001$ ) and a significant gene x treatment  
186 interaction ( $F_{2,248} = 5.67$ ;  $P < 0.01$ ). Both lines of *Cyp1a2(-/-)* knockout mice had longer strides than wild  
187 type mice, and PCB-treated *Ahr<sup>b</sup>Cyp1a2(+/+)* wild type mice had shorter stride lengths than all other

188 groups (Fig. 4A). There was also a significant main effect of genotype for stride width (Fig. 4B) with  
189 *Ahr<sup>d</sup>Cyp1a2(-/-)* knockout mice having significantly wider strides ( $F_{2,248} = 10.48$ ;  $P < 0.001$ ). There were  
190 no significant differences by genotype or treatment for stride differential ( $P > 0.05$ ).

### 191 3.3.3 Sticker removal.

192 PCB-treated *Ahr<sup>b</sup>Cyp1a2(-/-)* knockout mice had the longest latencies to remove the adhesive sticker;  
193 however, the differences were not statistically significant ( $F_{2,281} = 1.37$ ;  $P = 0.26$ ). There was a trend for a  
194 genotype effect ( $F_{2,281} = 2.80$ ;  $P = 0.062$ ) with *Ahr<sup>b</sup>Cyp1a2(-/-)* knockout mice having the longest latencies  
195 compared with wild type mice and *Ahr<sup>d</sup>Cyp1a2(-/-)* knockout mice (Fig. 5).

### 196 3.3.4 Pole test.

197 There were no differences in the time to turn or the time to descend the pole based on treatment; however,  
198 females had significantly shorter turn ( $F_{1,295} = 5.56$ ;  $P < 0.05$ ) and descent times compared with males  
199 ( $F_{1,295} = 4.74$ ;  $P < 0.05$ ), and *Ahr<sup>d</sup>Cyp1a2(-/-)* knockout mice had significantly shorter turn ( $F_{2,295} = 4.27$ ;  $P$   
200  $< 0.05$ ) and descent times ( $F_{2,295} = 7.23$ ;  $P < 0.001$ ) compared with *Ahr<sup>b</sup>* knockout and wild type mice (Figs.  
201 6A-B).

### 202 3.3.5 Challenging balance beam.

203 There was a significant main effect of genotype for latency to cross the balance beam with *Ahr<sup>d</sup>Cyp1a2(-*  
204 *-/-)* knockout mice having significantly shorter latencies ( $F_{2,121} = 3.36$ ;  $P < 0.05$ ) compared with *Ahr<sup>b</sup>*  
205 knockout and wild type mice (Fig. 7A). There was a significant gene x treatment interaction ( $F_{2,117} = 6.54$ ;  
206  $P < 0.01$ ) for the number of slips with PCB-treated *Ahr<sup>b</sup>* mice having more slips while PCB-treated  
207 *Ahr<sup>d</sup>Cyp1a2(-/-)* knockout mice had significantly fewer slips (Fig. 7B). There was also a significant gene  
208 x treatment interaction ( $F_{2,117} = 6.07$ ;  $P < 0.01$ ) for the ratio of slips/steps with PCB-treated *Ahr<sup>b</sup>* mice  
209 having more slips per step while PCB-treated *Ahr<sup>d</sup>Cyp1a2(-/-)* knockout mice had significantly fewer  
210 slips per step (Fig. 7C).

211 **4. Discussion and conclusions.**

212 Our data confirm that an environmentally relevant PCB mixture only activates the AHR in high-affinity  
213 *Ahr<sup>b</sup>* mice and that CYP1A2 is protective against PCB-induced neurotoxicity. This supports our previous  
214 findings (Curran et al. 2011b, 2012) and extends them to motor deficits. We did not find evidence of  
215 significant oxidative stress following PCB exposure, although it appears that the antioxidant response  
216 system had been activated, since both oxidized and reduced glutathione levels were significantly  
217 increased in the most susceptible *Ahr<sup>b</sup>Cyp1a2(-/-)* mice.

218 Our motor battery was designed to assess both nigrostriatal pathways and cerebellar function, and the data  
219 indicate that both regions are affected, but not equally. PCB-treated mice from all three genotypes showed  
220 impaired performance on the rotarod compared to corn oil-treated controls, indicating a cerebellar deficit.  
221 Motor learning was reduced in the two knockout lines. Interestingly, there was also a motor deficit in both  
222 corn oil-treated lines of *Cyp1a2(-/-)* mice. There is evidence to suggest CYP1A2 has a normal function in  
223 the brain. CYP1A2 is differentially regulated in the cortex and cerebellum (Iba et al. 2003). The enzyme  
224 can also be induced in the brain in a region-specific manner with highest levels seen in the pons, medulla,  
225 cerebellum, frontal cortex (Yadav et al. 2006) and hypothalamus (Korkalainen et al. 2005). CYP1A2 is  
226 normally down-regulated during cerebellar granule cell migration (Mulero-Navarro et al. 2003). Together  
227 with our findings, these data warrant further study of CYP1A2's role in cerebellar development and  
228 function.

229 Results from the gait analysis did not support our hypothesis of genetic susceptibility in *Cyp1a2(-/-)* mice.  
230 In contrast, PCB-treated *Ahr<sup>b</sup>Cyp1a2(+/+)* mice had shorter strides than corn oil-treated control mice and  
231 both groups of PCB-treated knockout mice. Nigrostriatal lesions result in shorter strides (Fleming et al.  
232 2004), so this suggests some impairment in the PCB-treated wild type mice. We previously reported  
233 striatal dopamine levels were significantly lower in PCB-treated *Ahr<sup>b</sup>Cyp1a2(-/-)* mice compared with  
234 PCB-treated *Ahr<sup>b</sup>Cyp1a2(+/+)* mice ( $p < 0.01$ ), so it's unlikely this impairment was caused by an  
235 absolute loss of dopamine.

236 Our findings are consistent with Caudle et al. (2006) who reported a significant decrease in expression of  
237 the dopamine transporter (DAT) in PCB-treated C57BL/6J mice, but no difference in striatal dopamine  
238 levels. Bemis and Seegal (2004) reported that PCB mixtures inhibit the vesicular monoamine transporter  
239 (VMAT) in synaptosomes from adult Long-Evans rats. Interestingly, Akahoshi *et al.* (2009, 2012)  
240 demonstrated that the liganded *AHR* upregulates tyrosine hydroxylase, the rate-limiting enzyme in  
241 dopamine production. Together, this suggests future work is needed to examine the inter-related effects of  
242 PCB mixtures on dopamine production, metabolism and transport.

243 The major finding in the pole test was a shorter latency to turn and descend the pole by *Ahr<sup>d</sup>Cyp1a2(-/-)*  
244 knockout mice; however, this difference could result from increased anxiety and greater motivation to  
245 return to the home cage. Since latencies were shorter than control mice, the results cannot be interpreted  
246 as an impairment in motor function. Similarly, *Ahr<sup>d</sup>Cyp1a2(-/-)* knockout mice had the shortest latency to  
247 remove an adhesive sticker, indicating a genetic difference in behavior, but not a PCB effect.

248 The challenging balance beam results support the hypothesis that *Ahr<sup>d</sup>Cyp1a2(-/-)* knockout mice have  
249 higher motivation to reach the goal box or home cage. Both PCB-treated and control mice from this line  
250 had significantly shorter latencies to traverse the beam compared with *Ahr<sup>b</sup>* mice. Both PCB-treated *Ahr<sup>b</sup>*  
251 groups showed impairments in this test, with more slips and more slips/step. This indicates PCB-induced  
252 impairments in nigrostriatal function only in the high-affinity *Ahr<sup>b</sup>* mice.

253 Efforts to identify a mode of action responsible for the distinct patterns of PCB-induced motor  
254 impairments observed in these experiments will need to consider both the genetic differences and the  
255 well-established model of noncoplanar PCB neurotoxicity mediated by the ryanodine receptor (RyR) and  
256 calcium dysregulation (Dingemans et al. 2016, Pessah et al. 2010, Roegge et al. 2006, Gafni et al. 2004).  
257 We note that our PCB mixture does contain noncoplanar PCBs, but the congeners included do not have  
258 the same high potency at the ryanodine receptor as its prototypical agonist PCB 95. Therefore, it is likely  
259 that an alternate mechanism or mechanisms are needed to explain all of the observed effects. In support of  
260 that concept, Roegge et al. (2006) found increased levels of RyR1 in PCB-treated Long-Evans rats, but no

261 evidence of increased receptor binding when looking at changes in the cerebellum. Meanwhile, Nguon et  
262 al (2005) reported increased GFAP expression and reduced cerebellar mass in Sprague-Dawley rats  
263 exposed to Aroclor during development. Males had more severe motor impairments on rotarod and  
264 greater increases in GFAP compared with females. In contrast, we found greater impairments in female  
265 mice. Piedrafita et al. (2008) identified the glutamate–NO–cGMP pathway as a cerebellar target of both  
266 coplanar PCB 126 and noncoplanar PCB 153 in Wistar rats. A follow-up study confirmed motor deficits  
267 for both PCB126 and PCB 153 with younger males at higher risk (Cauli et al. 2013).

268 A limitation of our studies was the use of gavage dosing. Although this allows precise dosing, it would be  
269 important to repeat these experiments using a chronic, low-level exposure in food. This is commonly  
270 done in rat studies (Miller et al. 2017, Roegge et al. 2006, Widholm et al. 2004), but can be a challenge  
271 when using mice. In addition, longer-term studies would allow an assessment of motor function in aged  
272 mice, which would better match the typical course of human Parkinson’s disease patients. Since  
273 behavioral testing began at P60, it is possible that only minor impairments would be seen in nigrostriatal  
274 pathways at that age with more pronounced effects in animals over 1 y of age.

275 Further work is needed to assess gene expression in the substantia nigra, striatum and cerebellum at  
276 multiple time points to verify that there were no adverse effects on dopaminergic neurons involved in  
277 motor function and to identify potential modes of action for the observed motor deficits. A histological  
278 examination of those tissues could also reveal morphological changes related to abnormal development. It  
279 would also be important to look at changes related to thyroid hormone depletion, because we previously  
280 found that circulating thyroxine (T4) levels were reduced 80% in *Ahr<sup>b</sup>Cyp1a2(-/-)* knockout mice  
281 compared with control levels at P6 (Curran et al. 2011a). Hydroxylated PCBs can cross the placenta  
282 (Meerts et al. 2002) and mimic the action of thyroid hormone (Giera et al. 2011, Darras et al. 2008).  
283 Recent work has implicated CYP1A1 in metabolism of non-coplanar PCB congeners (Wadzinski et al.  
284 2014, Gauger et al. 2007) to thyromimetic forms. Both 4-OH-PCB 107 (Berghuis et al. 2013) and OH-  
285 PCB 106

286 (Haijima et al. 2017) cause motor deficits, so it will be important to look into differential metabolism of  
287 parent congeners in the susceptible and resistant lines of mice.

#### 288 **4.1 Conclusions.**

289 Our data provides some evidence that developmental exposure to PCBs is a risk factor for Parkinson's  
290 disease, but clearly demonstrate adverse effects on cerebellar development and function as well as  
291 disruption of nigrostriatal pathways. The data presented here and our previous studies (Curran et al. 2011a  
292 and 2011b) provide strong evidence that both *Ahr* and *Cyp1a2* genotypes affect developmental  
293 neurotoxicity to polychlorinated biphenyls. We have extended our previous studies on learning and  
294 memory deficits to demonstrate that high-affinity *Ahr<sup>b</sup>Cyp1a2(-/-)* knockout mice are uniquely  
295 susceptible to motor dysfunction following PCB exposure during gestation and lactation. By including  
296 corn oil-treated control mice of three genotypes in our studies, we also uncovered a previously unreported  
297 motor deficit in *Cyp1a2(-/-)* mice, regardless of *Ahr* genotype. Given known human variation in the aryl  
298 hydrocarbon receptor and CYP1A2, these studies support the use of our mouse model to explore  
299 developmental neurotoxicity of similar persistent organic pollutants and the role of CYP1A2 in normal  
300 brain development and function.

#### 301 **5. Conflicts of interest.**

302 The authors report no conflicts of interest.

#### 303 **6. Acknowledgements.**

This work was supported by the National Institutes of Health [R15ES020053, P20 GM103436], the National Science Foundation [RSF-034-07, DUE-STEP-096928], and the following grants from Northern Kentucky University: Faculty Development Project Grants, College of Arts & Sciences Collaborative Faculty-Student Award, Center for Integrative Natural Science and Mathematics Research Grants, and Dorothy Westerman Herrmann funds. We thank Dr. David Thompson of Northern Kentucky University's Department of Biological Sciences for assistance with the EROD assays, Collin Johnson for help with the

Western blots, Mary Moran of Cincinnati Children's Research Foundation for assistance with data analysis, and we acknowledge the generous donation of *Cyp1a2(-/-)* knockout mice from Dr. Daniel W. Nebert, University of Cincinnati Department of Environmental Health.

## 304 7. References.

- 305 [ATSDR] Agency for Toxic Substances and Disease Registry. 2015. 2015 CERCLA National Priorities  
306 List of Hazardous Substances. U.S. Department of Health and Human Services, Public Health  
307 Service. Atlanta, GA. <https://www.atsdr.cdc.gov/spl/>
- 308 Akahoshi, E., Yoshimura, S., Uruno, S., Ishihara-Sugano, M., 2009. Effect of dioxins on regulation of  
309 tyrosine hydroxylase gene expression by aryl hydrocarbon receptor: a neurotoxicology study.  
310 *Environ. Health Glob. Access Sci. Source* 8, 24.
- 311 Akahoshi, E., Yoshimura, S., Uruno, S., Itoh, S., Ishihara-Sugano, M., 2012. Tyrosine hydroxylase assay:  
312 a bioassay for aryl hydrocarbon receptor-active compounds based on tyrosine hydroxylase  
313 promoter activation. *Toxicol. Mech. Methods* 22, 458–460.
- 314 Anezaki K, Kannan N, Nakano T. (2015). Polychlorinated biphenyl contamination of paints containing  
315 polycyclic- and Naphthol AS-type pigments. *Environ Sci Pollut Res Int.* 22(19):14478-88.
- 316 Bányiová, K., Černá, M., Mikeš, O., Komprdová, K., Sharma, A., Gyalpo, T., Čupr, P., Scheringer, M.  
317 (2017). Long-term time trends in human intake of POPs in the Czech Republic indicate a need for  
318 continuous monitoring. *Environ. Int.* 108, 1–10.
- 319 Bemis, J.C., Seegal, R.F., 2004. PCB-induced inhibition of the vesicular monoamine transporter predicts  
320 reductions in synaptosomal dopamine content. *Toxicol. Sci. Off. J. Soc. Toxicol.* 80, 288–295.
- 321 Berghuis S.A., Soechitram S.D., Hitzert M.M., Sauer P.J.J. and Bos A.F. (2013). Prenatal exposure to  
322 polychlorinated biphenyls and their hydroxylated metabolites is associated with motor  
323 development of three-month-old infants. *NeuroToxicology.* 38, 124-130.
- 324 Boucher, O., Muckle, G., Ayotte, P., Dewailly, E., Jacobson, S.W., Jacobson, J.L. (2016). Altered fine  
325 motor function at school age in Inuit children exposed to PCBs, methylmercury, and lead.  
326 *Environ. Int.* 95, 144–151.
- 327 Brown, E.G., 1988. Mixed anionic detergent/aliphatic alcohol-polyacrylamide gel  
328 electrophoresis alters the separation of proteins relative to conventional sodium dodecyl  
329 sulfate-polyacrylamide gel electrophoresis. *Anal. Biochem.* 174, 337–348.
- 330 Caudle, W. M., Richardson, J. R., Delea, K. C., Guillot, T. S., Wang, M., Pennell, K. D. et al. (2006).  
331 Polychlorinated biphenyl-induced reduction of dopamine transporter expression as a precursor to  
332 Parkinson's disease-associated dopamine toxicity. *Toxicol.Sci.*, 92, 490-499.
- 333 Cauli O, Piedrafita B, Llansola M, Felipo V. (2013). Gender differential effects of developmental  
334 exposure to methyl-mercury, polychlorinated biphenyls 126 or 153, or its combinations on motor  
335 activity and coordination. *Toxicology.* 311(1-2):61-8.

- 336 Chishti, M. A., Fisher, J. P., & Seegal, R. F. (1996). Aroclors 1254 and 1260 reduce dopamine  
337 concentrations in rat striatal slices. *Neurotoxicology*, *17*, 653-660.
- 338 Curran, C.P., Vorhees, C.V., Williams, M.T., Genter, M.B., Nebert, D.W. (2011a). In utero and  
339 lactational exposure to a complex mixture of polychlorinated biphenyls: toxicity in pups  
340 dependent on the *Cyp1a2* and *Ahr* genotypes. *Toxicol. Sci.* *119*, 189-208..
- 341 Curran, C.P. Nebert D.W., Genter M.B., Patel K.V., Schafer, T.L., Skelton M.R., Williams M.T. and  
342 Vorhees C.V. (2011b). In Utero and Lactational Exposure to PCBs in Mice: Adult offspring show  
343 altered learning and memory depending on *Cyp1a2* and *Ahr* genotypes. *Environ. Health Perspect.*  
344 *119(9)*, 1286-93.
- 345 Curran C.P., Altenhofen E., Ashworth A.A., Brown A., Curran M.A., Evans A., Floyd R., Fowler J.P.,  
346 Garber H., Hays B., Kamau-Cheggeh C., Kraemer S., Lang A.L., Mynhier A., Samuels A. and  
347 Strohamier C. (2012). *Ahr*Cyp1a2(-/-) mice show increased susceptibility to PCB-induced  
348 developmental neurotoxicity. *Neurotoxicology*. *33(6)*, 1436-42.
- 349 Darras V.M. (2008). Endocrine disrupting polyhalogenated organic pollutants interfere with thyroid  
350 hormone signalling in the developing brain. *The Cerebellum*. 26-37.
- 351 Dingemans, M.M.L., Kock, M., van den Berg, M. (2016). Mechanisms of action point towards combined  
352 PBDE/NDL-PCB risk assessment. *Toxicol. Sci.* *153*, 215–224.
- 353 Dragin, N., Dalton, T. P., Miller, M. L., Shertzer, H. G., & Nebert, D. W. (2006). For dioxin-induced  
354 birth defects, mouse or human CYP1A2 in maternal liver protects whereas mouse CYP1A1 and  
355 CYP1B1 are inconsequential. *J.Biol.Chem.*, *281*, 18591-18600.
- 356 Fernagut PO, Chalon S, Diguet E, Guilloteau D, Tison F, Jaber M (2003). Motor behaviour deficits and  
357 their histopathological and functional correlates in the nigrostriatal system of dopamine  
358 transporter knockout mice. *Neuroscience* *116*:1123–1130.
- 359 Fleming, S.M., Salcedo, J., Fernagut, P.-O., Rockenstein, E., Masliah, E., Levine, M.S., Chesselet, M.-F.,  
360 2004. Early and progressive sensorimotor anomalies in mice overexpressing wild-type human  
361 alpha-synuclein. *J. Neurosci. Off. J. Soc. Neurosci.* *24*, 9434–9440.
- 362 Gafni, J., Wong, P.W., Pessah, I.N., 2004. Non-coplanar 2,2',3,5',6-pentachlorobiphenyl (PCB 95)  
363 amplifies ionotropic glutamate receptor signaling in embryonic cerebellar granule neurons by a  
364 mechanism involving ryanodine receptors. *Toxicol. Sci. Off. J. Soc. Toxicol.* *77*, 72–82.
- 365 Gauger, K. J., Giera, S., Sharlin, D. S., Bansal, R., Iannaccone, E., & Zoeller, R. T. (2007).  
366 Polychlorinated biphenyls 105 and 118 form thyroid hormone receptor agonists after cytochrome  
367 P4501A1 activation in rat pituitary GH3 cells. *Environ.Health Perspect.*, *115*, 1623-1630.
- 368 Giera, S., Bansal, R., Ortiz-Toro, T. M., Taub, D. G., & Zoeller, R. T. (2011). Individual polychlorinated  
369 biphenyl (PCB) congeners produce tissue- and gene-specific effects on thyroid hormone signaling  
370 during development. *Endocrinology*, *152*, 2909-2919.
- 371 Gomara, B., Bordajandi, L. R., Fernandez, M. A., Herrero, L., Abad, E., Abalos, M. et al. (2005). Levels  
372 and trends of polychlorinated dibenzo-p-dioxins/furans (PCDD/Fs) and dioxin-like



- 373 polychlorinated biphenyls (PCBs) in Spanish commercial fish and shellfish products, 1995-2003.  
374 *J.Agric.Food Chem.*, 53, 8406-8413.
- 375 Haijima, A., Lesmana, R., Shimokawa, N., Amano, I., Takatsuru, Y., Koibuchi, N. (2017). Differential  
376 neurotoxic effects of in utero and lactational exposure to hydroxylated polychlorinated biphenyl  
377 (OH-PCB 106) on spontaneous locomotor activity and motor coordination in young adult male  
378 mice. *J. Toxicol. Sci.* 42, 407–416.
- 379 Hu D and Hornbuckle KC. (2010). Inadvertent polychlorinated biphenyls in commercial paint pigments.  
380 *Environ Sci Technol.*44(8):2822-7.
- 381 Iba, M. M., Storch, A., Ghosal, A., Bennett, S., Reuhl, K. R., & Lowndes, H. E. (2003). Constitutive and  
382 inducible levels of CYP1A1 and CYP1A2 in rat cerebral cortex and cerebellum. *Arch.Toxicol.*,  
383 77, 547-554.
- 384 Jacobson, J. L. & Jacobson, S. W. (2003). Prenatal exposure to polychlorinated biphenyls and attention at  
385 school age. *J.Pediatr.*, 143, 780-788.
- 386 Korkalainen, M., Linden, J., Tuomisto, J., & Pohjanvirta, R. (2005). Effect of TCDD on mRNA  
387 expression of genes encoding bHLH/PAS proteins in rat hypothalamus. *Toxicology*, 208, 1-11.
- 388 Langer, P., Kocan, A., Tajtakova, M., Petrik, J., Chovancova, J., Drobna, B. et al. (2007). Fish from  
389 industrially polluted freshwater as the main source of organochlorinated pollutants and increased  
390 frequency of thyroid disorders and dysglycemia. *Chemosphere*, 67, S379-S385.
- 391 Malisch, R., Kotz, A., 2014. Dioxins and PCBs in feed and food--review from European perspective. *Sci.*  
392 *Total Environ.* 491–492, 2–10.
- 393 Marek RF, Thorne PS, DeWall J, Hornbuckle KC. 2014. Variability in PCB and OH-PCB serum levels in  
394 children and their mothers in urban and rural U.S. communities. *Environ Sci*  
395 *Technol.*48(22):13459-67.
- 396 Marek RF, Thorne PS, Herkert NJ, Awad AM, Hornbuckle KC. (2017) Airborne PCBs and OH-PCBs  
397 Inside and Outside Urban and Rural U.S. Schools. *Environ Sci Technol.* 51(14):7853-7860.
- 398 Matsuura K, Kabuto H, Makino H, Ogawa N. (1997). Pole test is a useful method for evaluating the  
399 mouse movement disorder caused by striatal dopamine depletion. *J Neurosci Methods* 73:45– 48.
- 400 Meerts, I.A.T.M., Assink, Y., Ceniijn, P.H., Van Den Berg, J.H.J., Weijers, B.M., Bergman, A., Koeman,  
401 J.H., Brouwer, A., 2002. Placental transfer of a hydroxylated polychlorinated biphenyl and effects  
402 on fetal and maternal thyroid hormone homeostasis in the rat. *Toxicol. Sci. Off. J. Soc. Toxicol.*  
403 68, 361–371.
- 404 Miller, M.M., Sprowles, J.L.N., Voeller, J.N., Meyer, A.E., Sable, H.J.K., 2017. Cocaine sensitization in  
405 adult Long-Evans rats perinatally exposed to polychlorinated biphenyls. *Neurotoxicol. Teratol.*  
406 62, 34–41.

- 407 Mulero-Navarro, S., Santiago-Josefat, B., Pozo-Guisado, E., Merino, J. M., & Fernandez-Salguero, P. M.  
408 (2003). Down-regulation of CYP1A2 induction during the maturation of mouse cerebellar  
409 granule cells in culture: role of nitric oxide accumulation. *Eur.J.Neurosci.*, 18, 2265-2272.
- 410 Nadler, J.J., Zou, F., Huang, H., Moy, S.S., Lauder, J., Crawley, J.N., Threadgill, D.W., Wright,  
411 F.A., Magnuson, T.R., 2006. Large-scale gene expression differences across brain  
412 regions and inbred strains correlate with a behavioral phenotype. *Genetics* 174, 1229–  
413 1236.
- 414 Nebert, D. W. & Dalton, T. P. (2006). The role of cytochrome P450 enzymes in endogenous signalling  
415 pathways and environmental carcinogenesis. *Nat.Rev.Cancer*, 6, 947-960.
- 416 Nguon, K., Baxter, M. G., & Sajdel-Sulkowska, E. M. (2005). Perinatal exposure to polychlorinated  
417 biphenyls differentially affects cerebellar development and motor functions in male and female  
418 rat neonates. *Cerebellum.*, 4, 112-122.
- 419 Novotna, B., Topinka, J., Solansky, I., Chvatalova, I., Lnenickova, Z., & Sram, R. J. (2007). Impact of air  
420 pollution and genotype variability on DNA damage in Prague policemen. *Toxicol.Lett.*, 172, 37-  
421 47.
- 422 Ogawa N, Hirose Y, Ohara S, Ono T, Watanabe Y (1985) A simple quantitative bradykinesia test in  
423 MPTP-treated mice. *Res Commun Chem Pathol Pharmacol* 50:435– 441.
- 424 Ogawa N, Mizukawa K, Hirose Y, Kajita S, Ohara S, Watanabe Y (1987). MPTP-induced parkinsonian  
425 model in mice: biochemistry, pharmacology and behavior. *Eur Neurol* 26[Suppl 1]:16 –23.
- 426 Pessah, I. N., Cherednichenko, G., & Lein, P. J. (2010). Minding the calcium store: Ryanodine receptor  
427 activation as a convergent mechanism of PCB toxicity. *Pharmacol.Ther.*, 125, 260-285.
- 428 Petersen, M. S., Halling, J., Bech, S., Wermuth, L., Weihe, P., Nielsen, F. et al. (2008). Impact of dietary  
429 exposure to food contaminants on the risk of Parkinson's disease. *Neurotoxicology*, 29, 584-590.
- 430 Quinn, C. L., Wania, F., Czub, G., & Breivik, K. (2011). Investigating intergenerational differences in  
431 human PCB exposure due to variable emissions and reproductive behaviors. *Environ.Health*  
432 *Perspect.*, 119, 641-646.
- 433 Roegge, C. S. & Schantz, S. L. (2006). Motor function following developmental exposure to PCBS  
434 and/or MEHG. *Neurotoxicol.Teratol.*, 28, 260-277.
- 435 Ross, G. (2004). The public health implications of polychlorinated biphenyls (PCBs) in the environment.  
436 *Ecotoxicol.Environ.Saf*, 59, 275-291.
- 437 Schallert T. (1988). Aging-dependent emergence of sensorimotor dysfunction in rats recovered from  
438 dopamine depletion sustained early in life. *Ann NY Acad Sci* 515:108 –120.
- 439 Schantz, S. L., Widholm, J. J., & Rice, D. C. (2003). Effects of PCB exposure on neuropsychological  
440 function in children. *Environ.Health Perspect.*, 111, 357-576.

- 441 Schultheis, P.J., Fleming, S.M., Clippinger, A.K., Lewis, J., Tsunemi, T., Giasson, B., Dickson, D.W.,  
442 Mazzulli, J.R., Bardgett, M.E., Haik, K.L., Ekhatov, O., Chava, A.K., Howard, J., Gannon, M.,  
443 Hoffman, E., Chen, Y., Prasad, V., Linn, S.C., Tamargo, R.J., Westbroek, W., Sidransky, E.,  
444 Krainc, D., Shull, G.E., 2013. Atp13a2-deficient mice exhibit neuronal ceroid lipofuscinosis,  
445 limited  $\alpha$ -synuclein accumulation and age-dependent sensorimotor deficits. *Hum. Mol. Genet.* 22,  
446 2067–2082.
- 447 Sedelis M, Schwarting RK, Huston JP (2001) Behavioral phenotyping of the MPTP mouse model of  
448 Parkinson's disease. *Behav Brain Res* 125:109–125.
- 449 Seegal, R. F., Brosch, K. O., & Bush, B. (1986). Polychlorinated biphenyls produce regional alterations  
450 of dopamine metabolism in rat brain. *Toxicol.Lett.*, 30, 197-202.
- 451 Seegal, R. F., Brosch, K. O., & Okoniewski, R. J. (1997). Effects of in utero and lactational exposure of  
452 the laboratory rat to 2,4,2',4'- and 3,4,3',4'-tetrachlorobiphenyl on dopamine function.  
453 *Toxicol.Appl.Pharmacol.*, 146, 95-103.
- 454 Seegal, R. F., Brosch, K. O., & Okoniewski, R. J. (2005). Coplanar PCB congeners increase uterine  
455 weight and frontal cortical dopamine in the developing rat: implications for developmental  
456 neurotoxicity. *Toxicol.Sci.*, 86, 125-131.
- 457 Seegal, R. F., Bush, B., & Brosch, K. O. (1994). Decreases in dopamine concentrations in adult, non-  
458 human primate brain persist following removal from polychlorinated biphenyls. *Toxicology*, 86,  
459 71-87.
- 460 Steenland, K., Hein, M. J., Cassinelli, R. T., Prince, M. M., Nilsen, N. B., Whelan, E. A. et al. (2006).  
461 Polychlorinated biphenyls and neurodegenerative disease mortality in an occupational cohort.  
462 *Epidemiology*, 17, 8-13.
- 463 Stewart, P., Reihman, J., Lonky, E., Darvill, T., & Pagano, J. (2000). Prenatal PCB exposure and neonatal  
464 behavioral assessment scale (NBAS) performance. *Neurotoxicol.Teratol.*, 22, 21-29.
- 465 Thompson, E.D., Burwinkel, K.E., Chava, A.K., Notch, E.G., Mayer, G.D., 2010. Activity of Phase I and  
466 Phase II enzymes of the benzo[a]pyrene transformation pathway in zebrafish (*Danio rerio*)  
467 following waterborne exposure to arsenite. *Comp. Biochem. Physiol. Toxicol. Pharmacol. CBP*  
468 152, 371–378.
- 469 Tsuchiya, Y., Nakai, S., Nakamura, K., Hayashi, K., Nakanishi, J., & Yamamoto, M. (2003). Effects of  
470 dietary habits and CYP1A1 polymorphisms on blood dioxin concentrations in Japanese men.  
471 *Chemosphere*, 52, 213-219.
- 472 van Duursen, M. B., Sanderson, J. T., & Van den, B. M. (2005). Cytochrome P450 1A1 and 1B1 in  
473 human blood lymphocytes are not suitable as biomarkers of exposure to dioxin-like compounds:  
474 polymorphisms and interindividual variation in expression and inducibility. *Toxicol.Sci.*, 85, 703-  
475 712.
- 476 Vreugdenhil, H. J., Lanting, C. I., Mulder, P. G., Boersma, E. R., & Weisglas-Kuperus, N. (2002). Effects  
477 of prenatal PCB and dioxin background exposure on cognitive and motor abilities in Dutch  
478 children at school age. *J.Pediatr.*, 140, 48-56.

- 479 Wadzinski, T.L., Geromini, K., McKinley Brewer, J., Bansal, R., Abdelouahab, N., Langlois, M.-F.,  
480 Takser, L., Zoeller, R.T., 2014. Endocrine disruption in human placenta: expression of the dioxin-  
481 inducible enzyme, CYP1A1, is correlated with that of thyroid hormone-regulated genes. *J. Clin.*  
482 *Endocrinol. Metab.* 99, E2735-2743.
- 483 [WHO] World Health Organization (2003.) Polychlorinated Biphenyls: Human Health Aspects. World  
484 Health Organization. Geneva, Switzerland.
- 485 Widholm, J. J., Seo, B. W., Strupp, B. J., Seegal, R. F., & Schantz, S. L. (2003). Effects of perinatal  
486 exposure to 2,3,7,8-tetrachlorodibenzo-p-dioxin on spatial and visual reversal learning in rats.  
487 *Neurotoxicol.Teratol.*, 25, 459-471.
- 488 Wilhelm, M., Ranft, U., Krämer, U., Wittsiepe, J., Lemm, F., Fürst, P., Eberwein, G., Winneke, G., 2008.  
489 Lack of neurodevelopmental adversity by prenatal exposure of infants to current lowered PCB  
490 levels: comparison of two German birth cohort studies. *J. Toxicol. Environ. Health A* 71, 700–  
491 702.

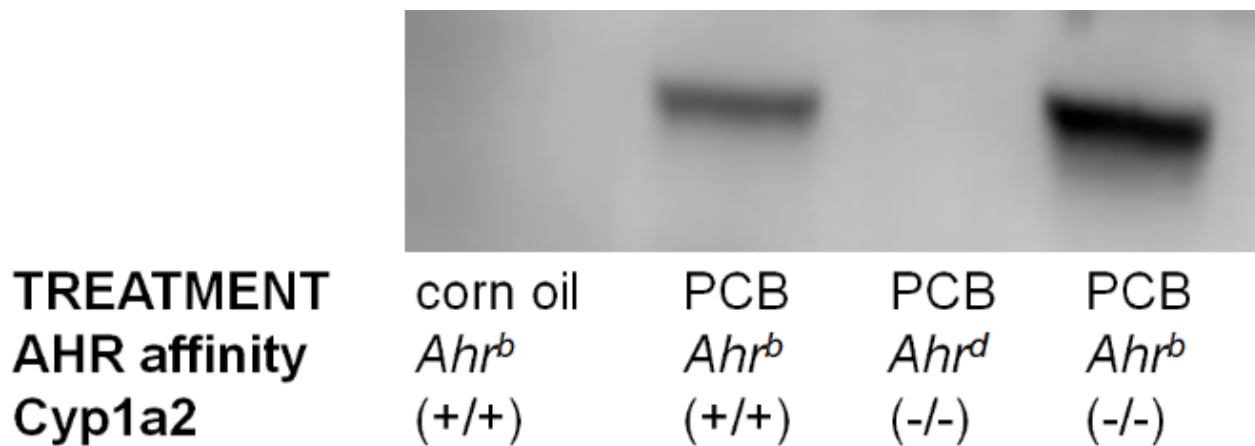

**Fig. 1** Western blot of CYP1A1 in liver. CYP1A1 is an inducible enzyme typically not detectable in tissues unless the aryl hydrocarbon (AHR) is activated. Our Western blot analysis confirmed the AHR was only activated in high-affinity *Ahr<sup>b</sup>* mice compared with corn oil-treated controls and poor-affinity *Ahr<sup>d</sup>* mice.

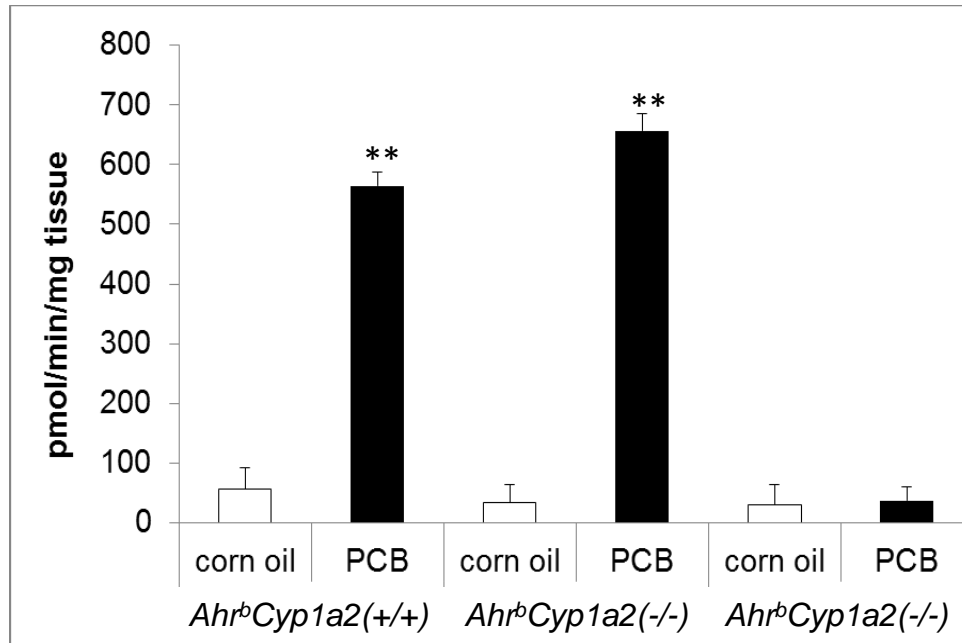

**Fig. 2A EROD activity in liver.** There was a significant gene x treatment interaction with higher EROD activity in liver of *Ahr<sup>b</sup>* mice compared with poor-affinity *Ahr<sup>d</sup>* mice.  $N \geq 9$  per group. \*\*  $P < 0.001$

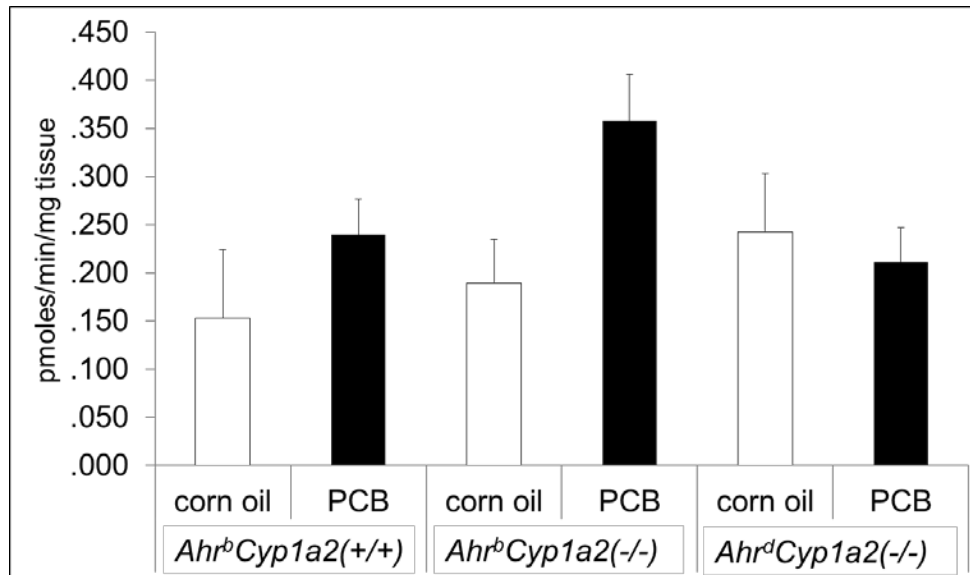

**Fig 2B EROD activity in cerebellum.** There was a trend for higher EROD activity in the cerebellum of *Ahr<sup>b</sup>Cyp1a2(-/-)* mice.  $P = 0.08$ .  $N \geq 5$  per group.

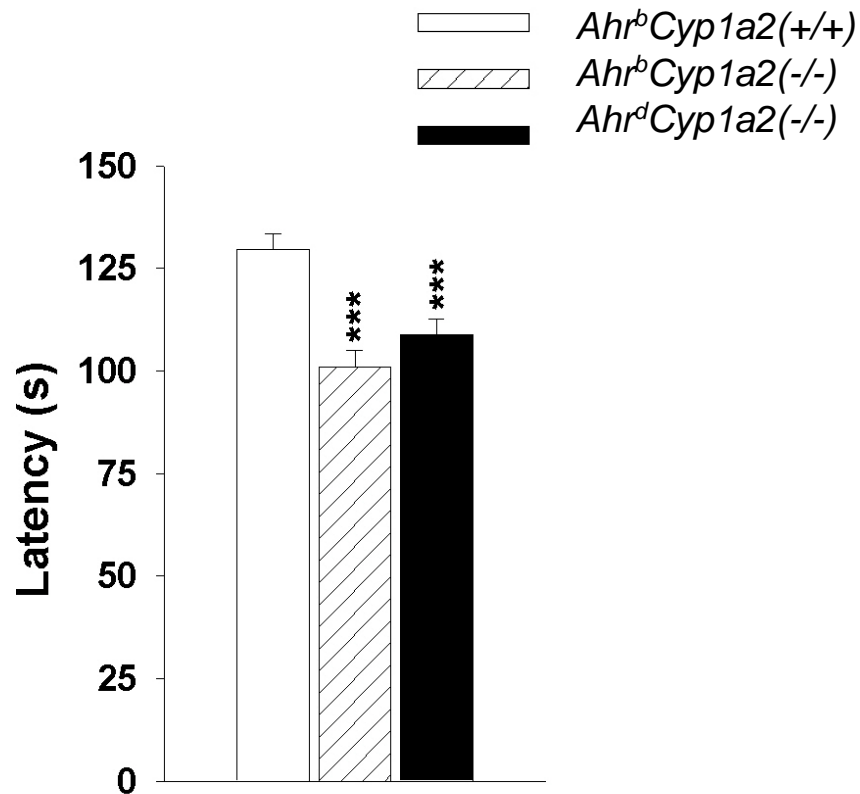

**Fig. 3A Rotarod performance by genotype.** There was a main effect of genotype with  $Cyp1a2(-/-)$  having significantly shorter latencies to fall off the rotarod. \*\*\*  $P < 0.001$ .

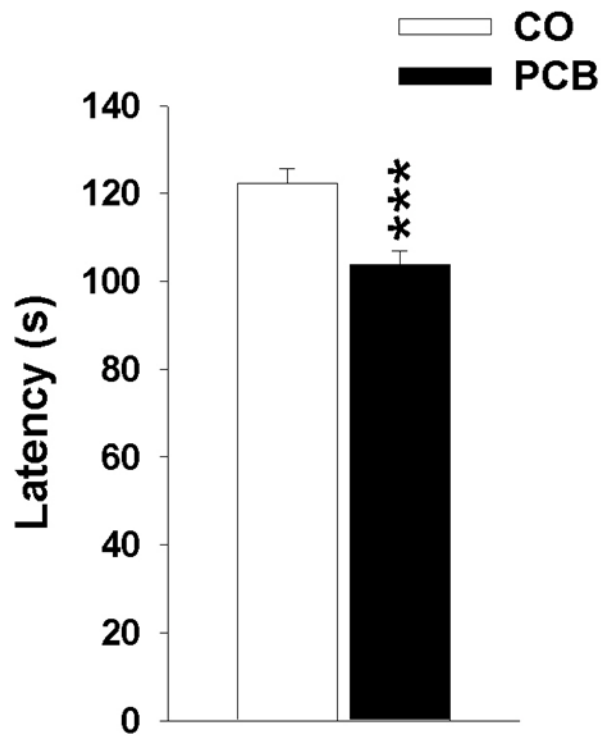

**Fig. 3B Rotarod performance by treatment.** There was a main effect of treatment on rotarod performance with PCB-treated mice having significantly shorter latencies to fall off the rotarod. \*\*\*  $P < 0.001$ .



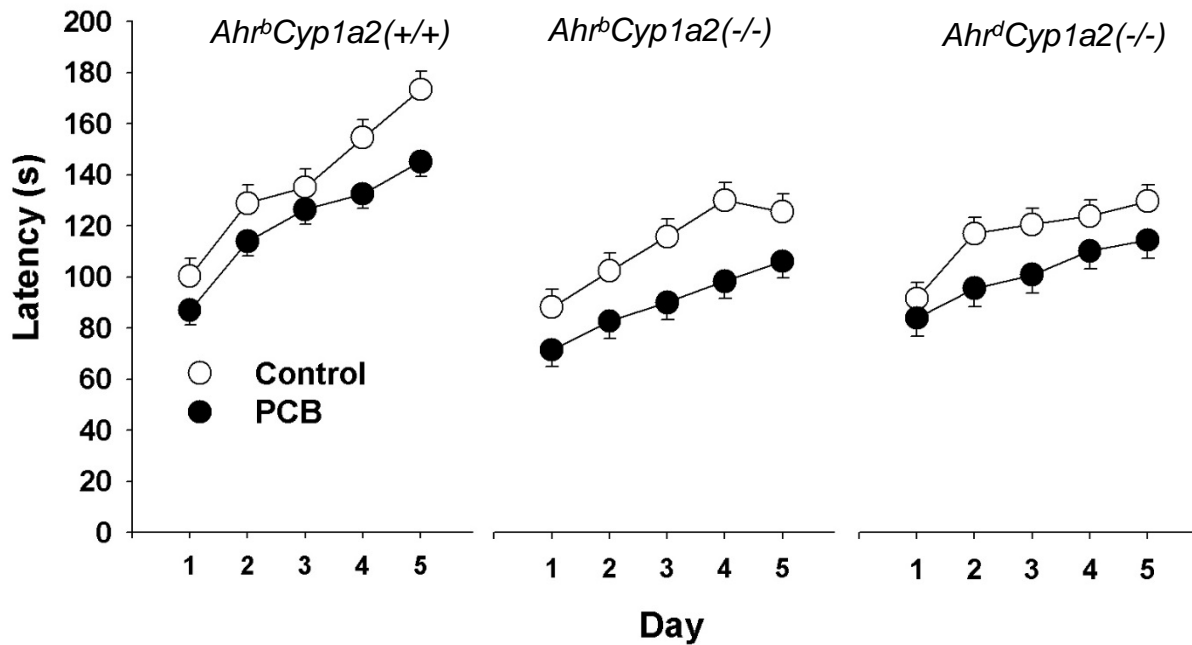

**Fig. 3C Rotarod performance over time (motor learning).** All groups of mice showed improvement over 5 days of testing, but high-affinity *Ahr<sup>b</sup>Cyp1a2(+/+)* showed the greatest motor learning compared with *Cyp1a2(-/-)* knockout mice. All PCB-treated mice showed impairments compared with their corn oil-treated controls.

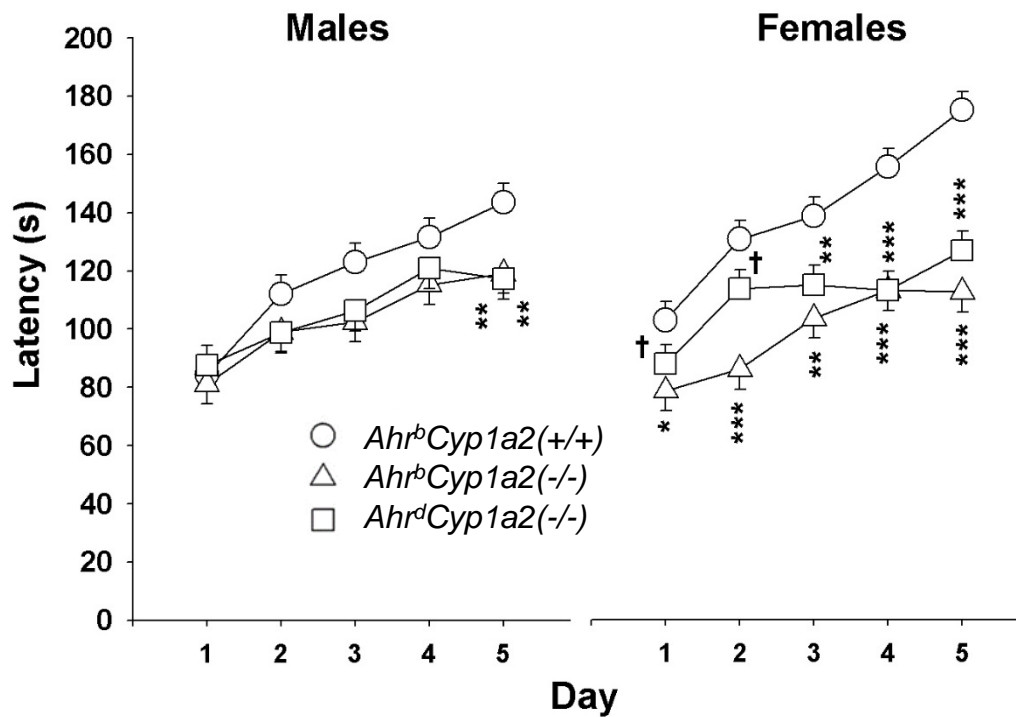

**Fig. 3D. Sex differences in rotarod performance.** Female mice with the *Cyp1a2(-/-)* genotype showed the greatest impairments on the rotarod test compared with *Cyp1a2(+/+)* wild type mice. \*P < 0.05, \*\* P < 0.01, \*\*\* P < 0.001.

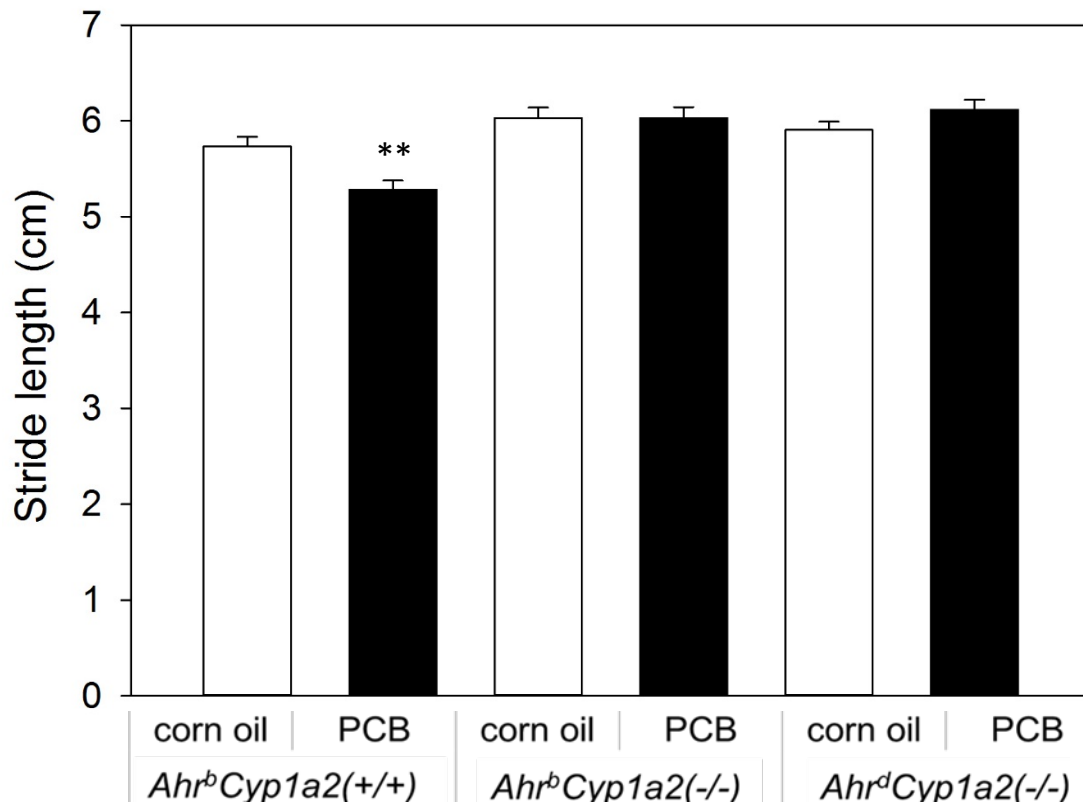

**Fig. 4A. Gait stride length.** PCB-treated *Ahr<sup>b</sup>Cyp1a2(+/+)* wild type mice had significantly shorter strides than all other groups. \*  $P < 0.01$ .

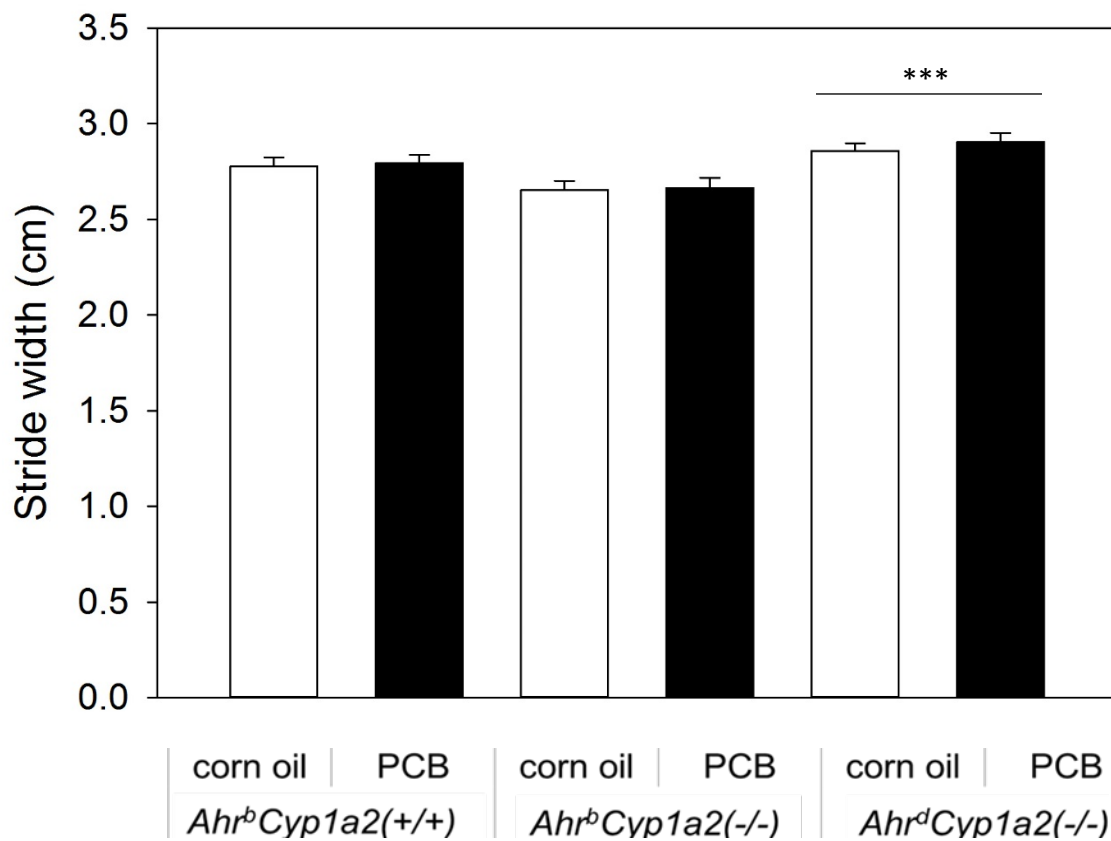

**Fig. 4B. Gait stride width.** *Ahr<sup>d</sup>Cyp1a2(-/-)* mice had significantly wider strides compared with the high-affinity *Ahr<sup>b</sup>* mice, but there was no effect of PCB treatment. \*\*\*  $P < 0.001$

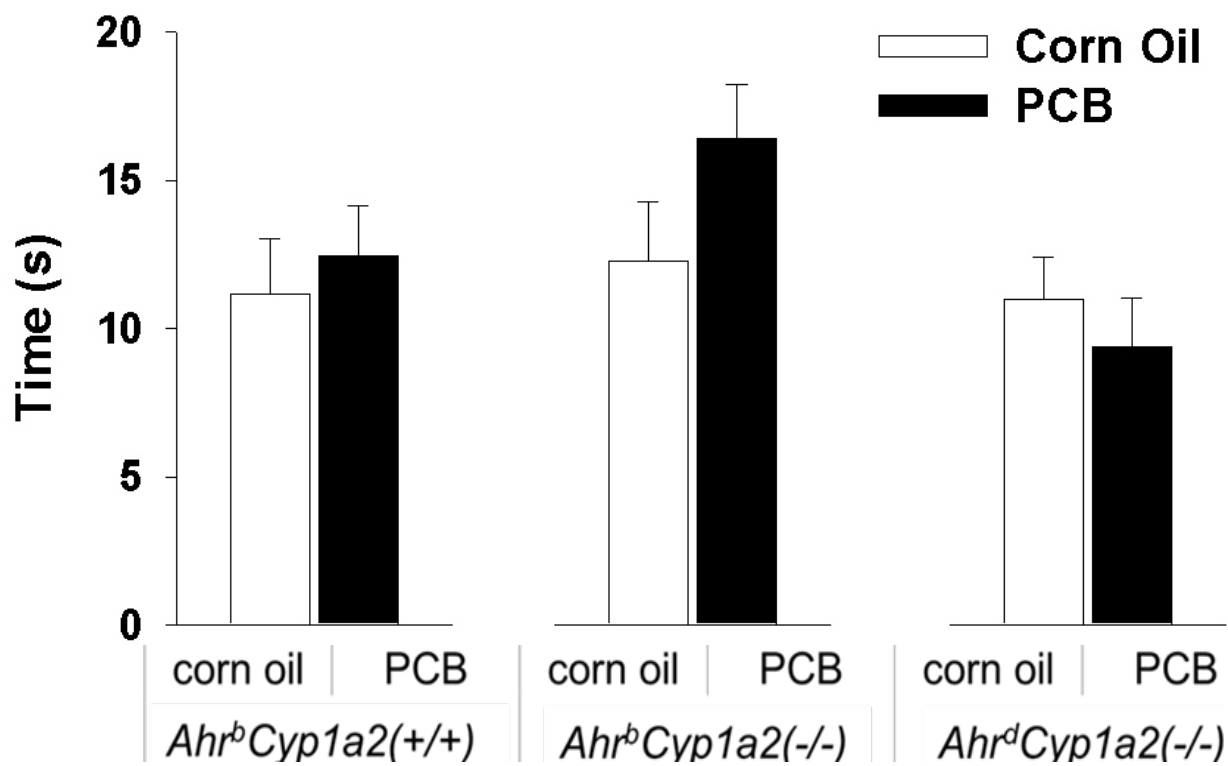

**Fig. 5. Latency to remove adhesive sticker.** There were no significant differences in the time required to remove a circular sticker, although PCB-treated *Ahr<sup>b</sup>Cyp1a2(-/-)* mice had the longest latencies of all groups.

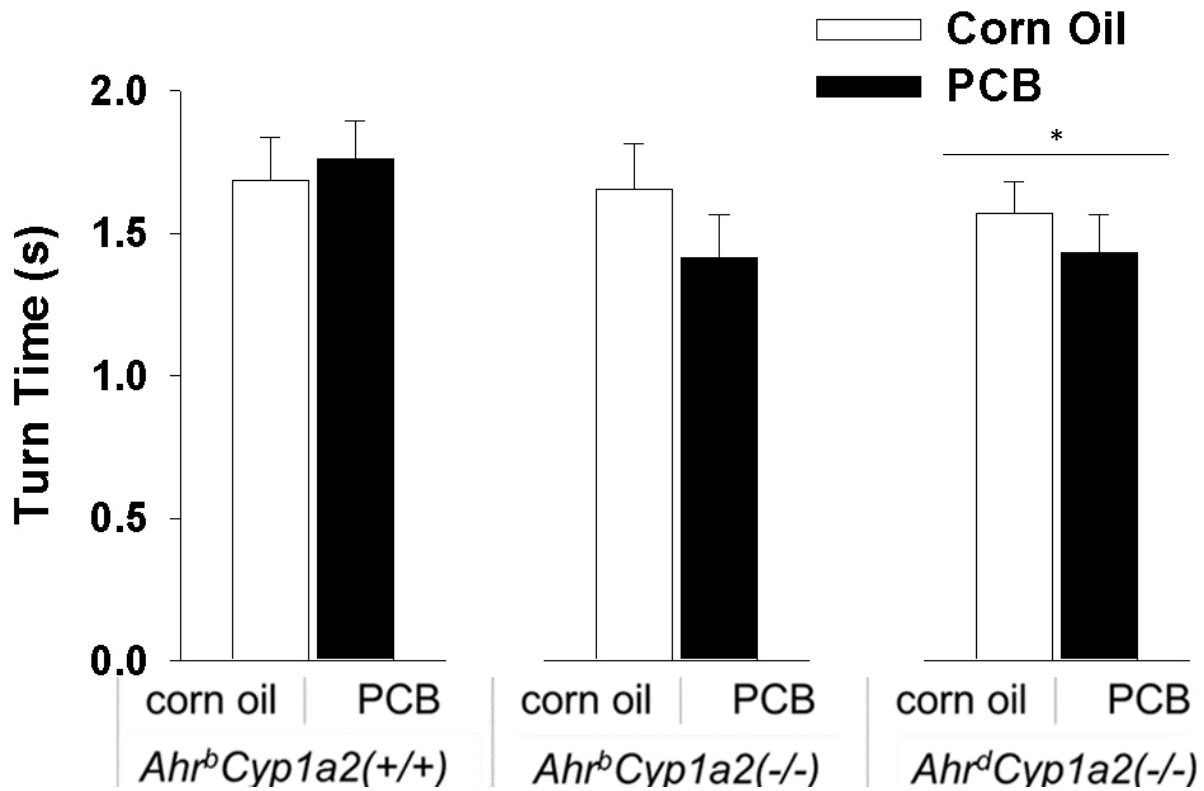

**Fig. 6A Pole turn time.** There was a main effect of genotype, but no effect of PCB treatment with poor-affinity *Ahr<sup>d</sup>Cyp1a2(-/-)* mice having the shortest latencies to turn downward on the pole. \*  $P < 0.05$ .

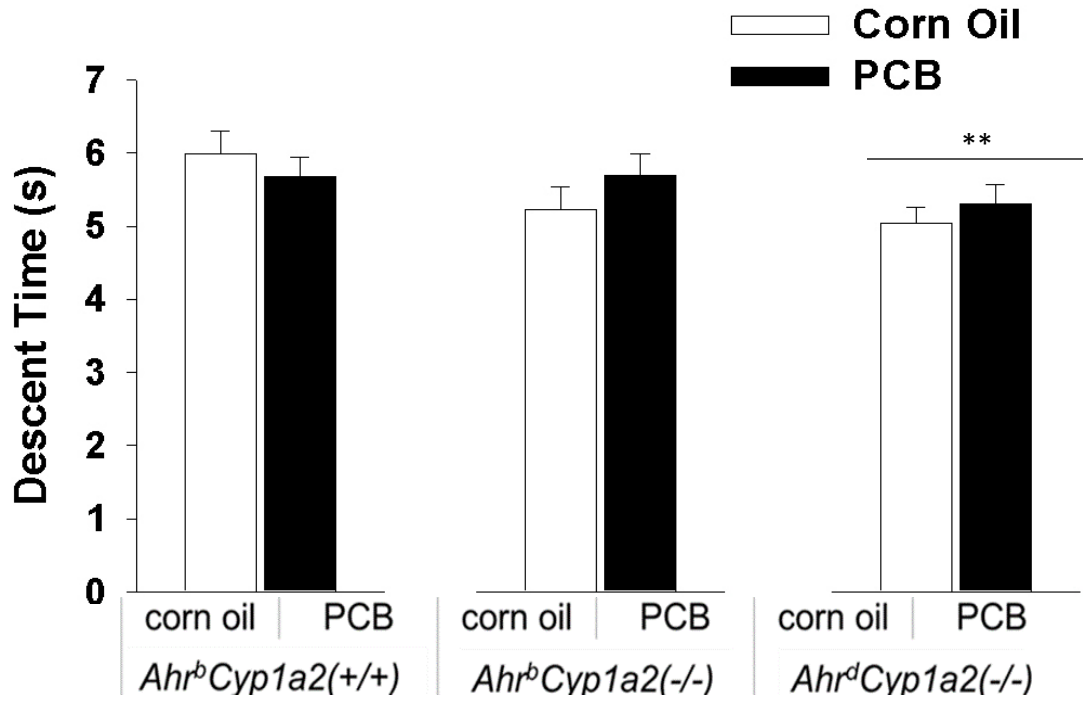

**Fig. 6BA Pole descent time.** There was a main effect of genotype, but no effect of PCB treatment with poor-affinity *Ahr<sup>d</sup>Cyp1a2(-/-)* having the shortest latencies to descend the pole back to the home cage. \*\*  $P < 0.01$ .

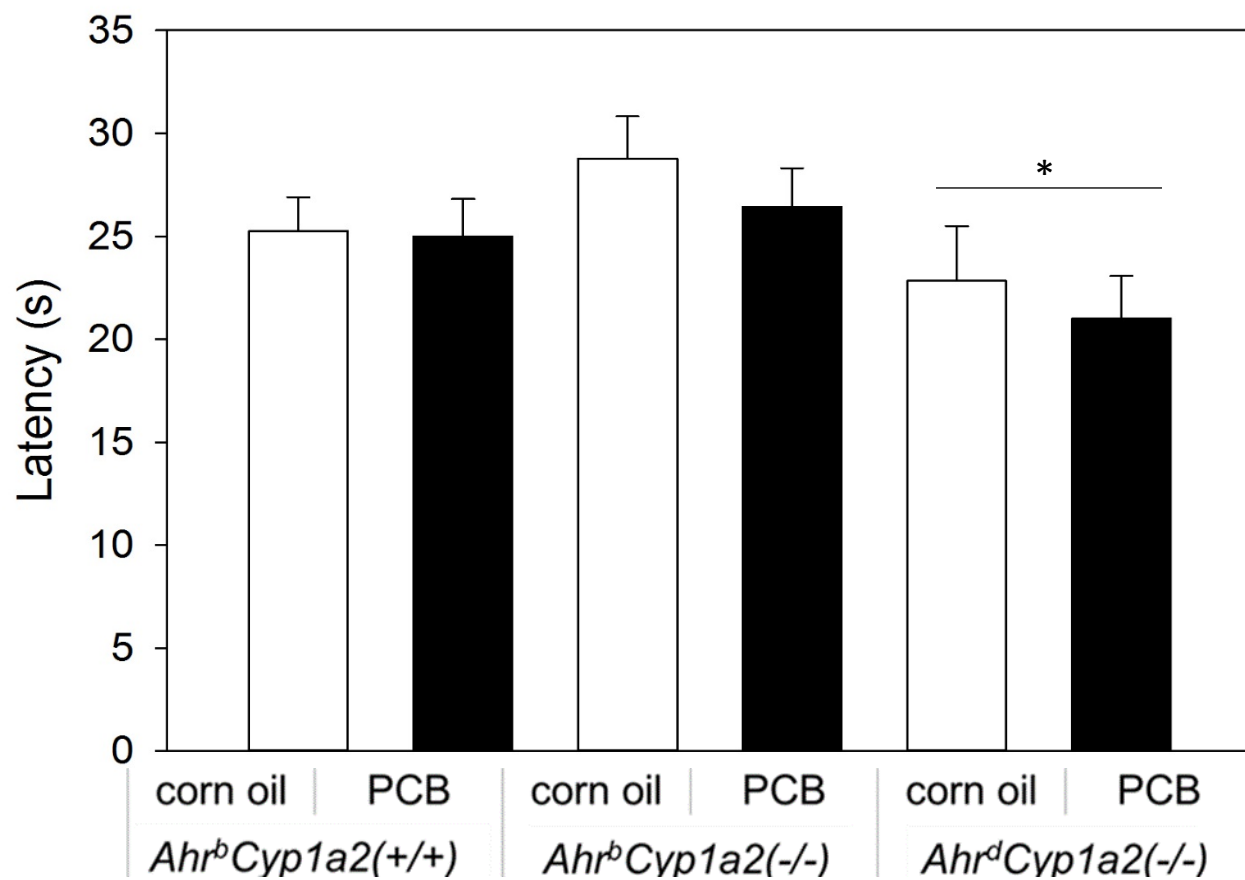

**Fig. 7A. Challenging beam latency.** *Ahr<sup>d</sup>Cyp1a2(-/-)* mice had the shortest latency to cross the balance beam, regardless of treatment. \*  $P < 0.05$



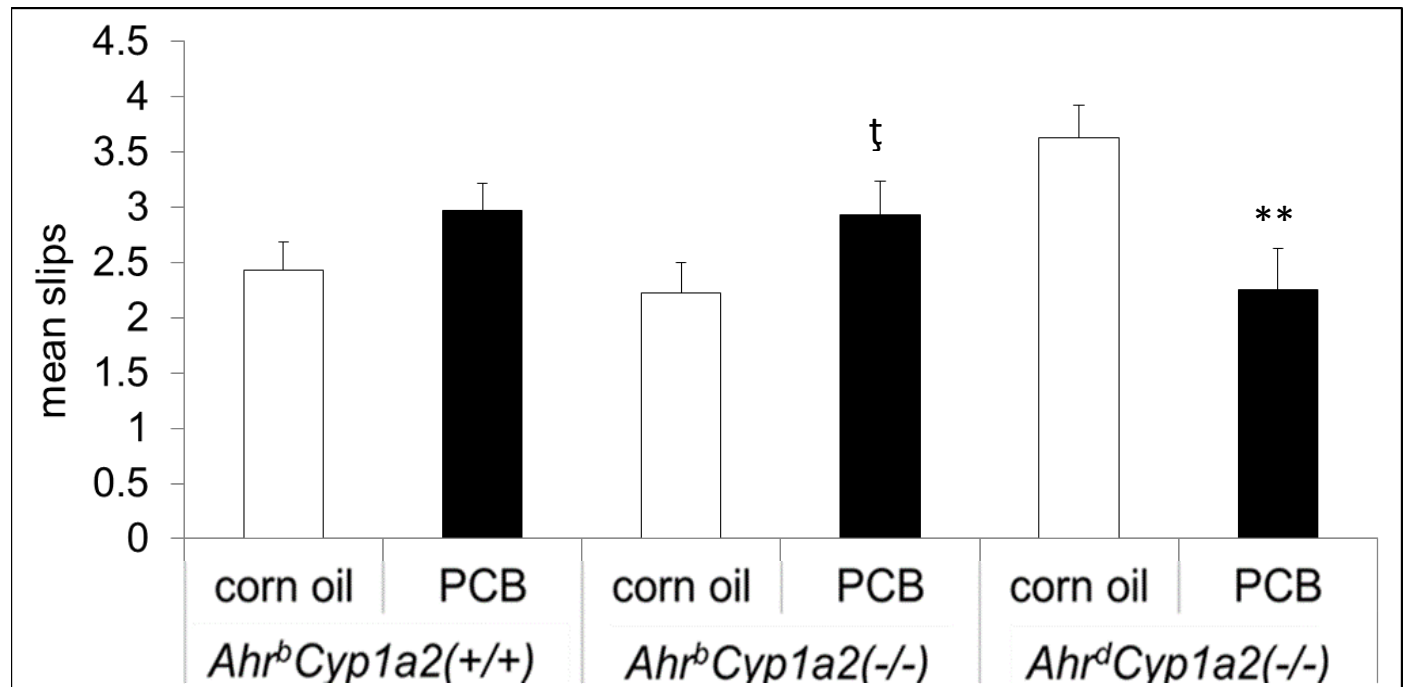

**Fig. 7B Mean slips on challenging beam.** There was a significant gene x treatment interaction with PCB-treated *Ahr<sup>b</sup>* mice having more slips than corn oil-treated controls of the same genotype and poor-affinity *Ahr<sup>d</sup>* mice having significantly fewer. †  $P < 0.1$ , \*\*  $P < 0.01$ .

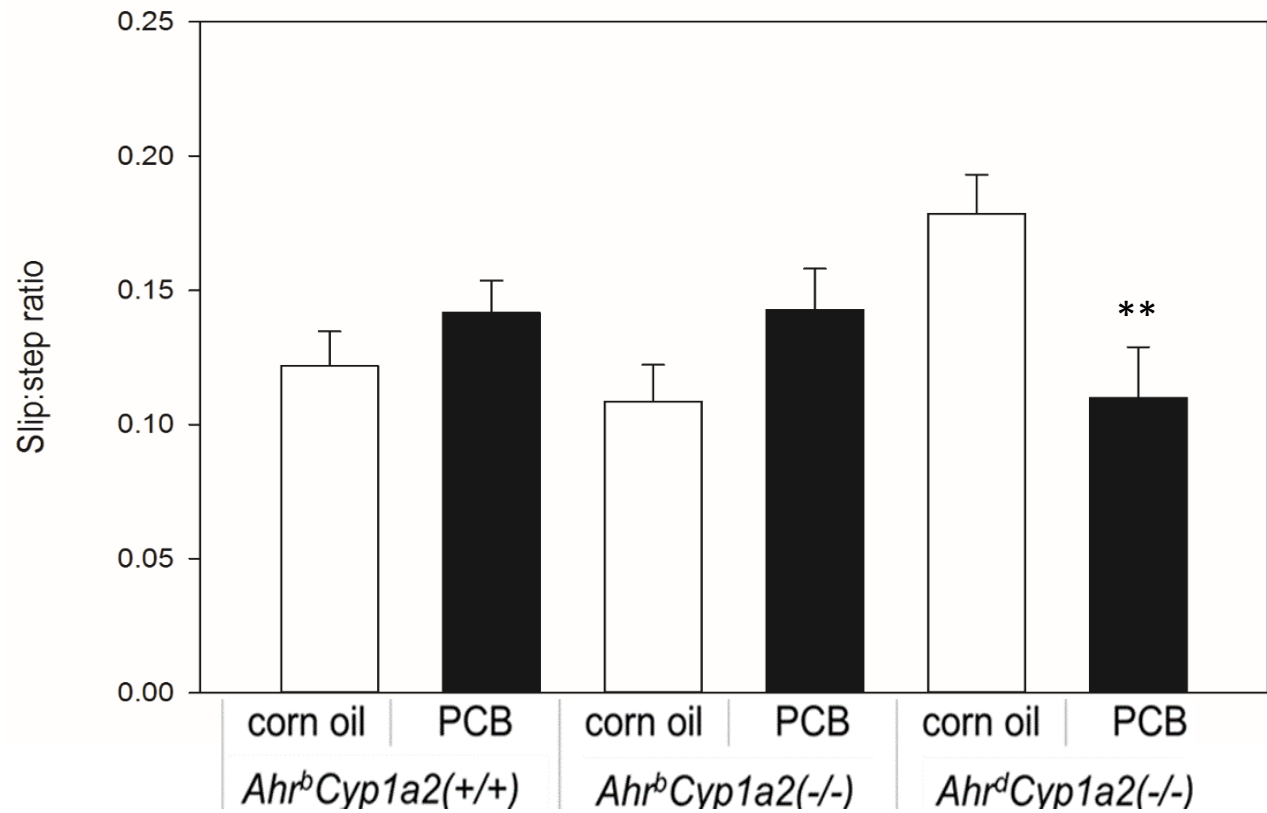

**Fig. 7C Slip to Step ratio on challenging beam.** There was a significant gene x treatment interaction with PCB-treated *Ahr<sup>b</sup>* mice having more slips and poor-affinity *Ahr<sup>d</sup>* mice having fewer. \*\* P < 0.01.
